# Supplementary material for: Densification and Surface Carbon Transformation of Diamond Powders under High Pressure and High Temperature
Source: MDPI journal article supplement (doi:10.3390/ma17030603), 2024-01-26
Supplement: s1 [file s1]

*Supporting information*

# **Densification and surface carbon transformation of diamond powders under High Pressure and High Temperature**

Rongqi Mao, Xiwei Cui, Jinglin Hao, Sizhuang Zhao, Shuai Hou, Fuli Lan, Yanbiao Li, Lifen Deng and He Li

## 1. Experimental conditions for hot pressed samples

All samples produced using various experimental conditions lists in Table S1.

**Table S1.** Experimental conditions for hot pressed samples

| Sample | Hydraulic Pressure (MPa) | Cavity pressure (GPa) | Power (kW) | Temperature (°C) | Particle Size (μm) | Average Particle Size (μm) |
|--------|--------------------------|-----------------------|------------|------------------|--------------------|----------------------------|
| A1     | 30 MPa                   | 5.3 GPa               | 4 kW       | 1023 °C          | G2-4               | 3.1                        |
| B1     |                          |                       |            |                  | G6-12              | 8.8                        |
| C1     |                          |                       |            |                  | G8-16              | 13.4                       |
| D1     |                          |                       |            |                  | G15-25             | 19.7                       |
| E1     |                          |                       |            |                  | G20-30             | 24.5                       |
| A2     |                          |                       | 5 kW       | 1256 °C          | G2-4               | 3.1                        |
| B2     |                          |                       |            |                  | G6-12              | 8.8                        |
| C2     |                          |                       |            |                  | G8-16              | 13.4                       |
| D2     |                          |                       |            |                  | G15-25             | 19.7                       |
| E2     |                          |                       |            |                  | G20-30             | 24.5                       |
| A3     |                          |                       | 6 kW       | 1494 °C          | G2-4               | 3.1                        |
| B3     |                          |                       |            |                  | G6-12              | 8.8                        |
| C3     |                          |                       |            |                  | G8-16              | 13.4                       |
| D3     |                          |                       |            |                  | G15-25             | 19.7                       |
| E3     |                          |                       |            |                  | G20-30             | 24.5                       |
| A4     | 40 MPa                   | 6.8 GPa               | 4 kW       | 1023 °C          | G2-4               | 3.1                        |
| B4     |                          |                       |            |                  | G6-12              | 8.8                        |
| C4     |                          |                       |            |                  | G8-16              | 13.4                       |
| D4     |                          |                       |            |                  | G15-25             | 19.7                       |
| E4     |                          |                       |            |                  | G20-30             | 24.5                       |
| A5     |                          |                       | 5 kW       | 1256 °C          | G2-4               | 3.1                        |
| B5     |                          |                       |            |                  | G6-12              | 8.8                        |
| C5     |                          |                       |            |                  | G8-16              | 13.4                       |
| D5     |                          |                       |            |                  | G15-25             | 19.7                       |
| E5     |                          |                       |            |                  | G20-30             | 24.5                       |
| A6     |                          |                       | 6 kW       | 1494 °C          | G2-4               | 3.1                        |
| B6     |                          |                       |            |                  | G6-12              | 8.8                        |
| C6     |                          |                       |            |                  | G8-16              | 13.4                       |
| D6     |                          |                       |            |                  | G15-25             | 19.7                       |
| E6     |                          |                       |            |                  | G20-30             | 24.5                       |

## 2. Raman Spectra

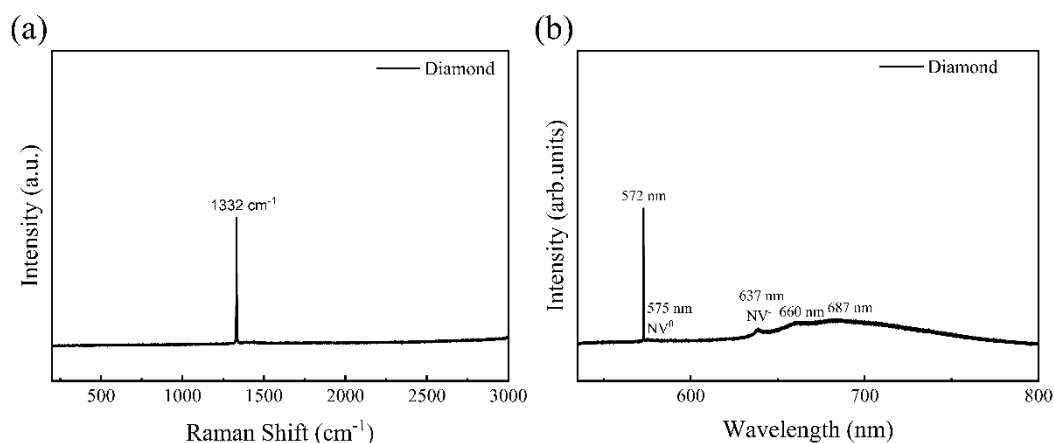

**Figure S1.** (a) Original diamond Raman Spectroscopy; (b) Original diamond PL spectrum;

Fig. S1 shows the Raman and PL spectra of the original diamond. This indicates that nitrogen does exist in the original diamond.

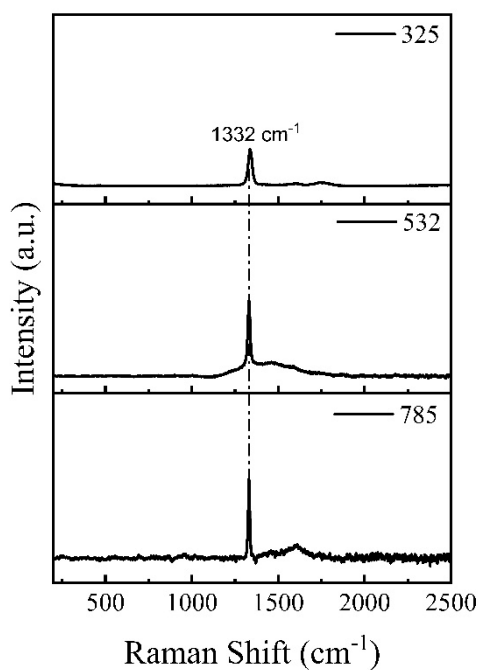

**Figure S2.** Raman spectra of hot pressed diamond with three different wavelengths;

Fig. S2 shows the Raman spectra of diamond samples with three different wavelengths of lasers: 325nm, 532nm, and 785nm. From the graph, it can be seen that there is a diamond peak at  $1332 \text{ cm}^{-1}$ .

The Raman spectra of hot-pressed samples after normalization of the diamond peak were presented in

Figure S3. Figure S3 (a), (b), (c), (d), (e) are the Raman spectra of hot-pressed samples of 30 MPa - 5 kW, 30 MPa - 6 kW, 40 MPa - 4 kW, 40 MPa - 5 kW, 40 MPa - 6 kW, respectively. Figure S5 (f), (g), (h), (i), (j) (k), (l), (m), (n) are the Raman spectra of hot-pressed samples of 30 MPa - A, 30 MPa - B, 30 MPa - D, 30 MPa - E, 40 MPa - A, 40 MPa - B, 40 MPa - C, 40 MPa - D, 40 MPa - E, respectively.

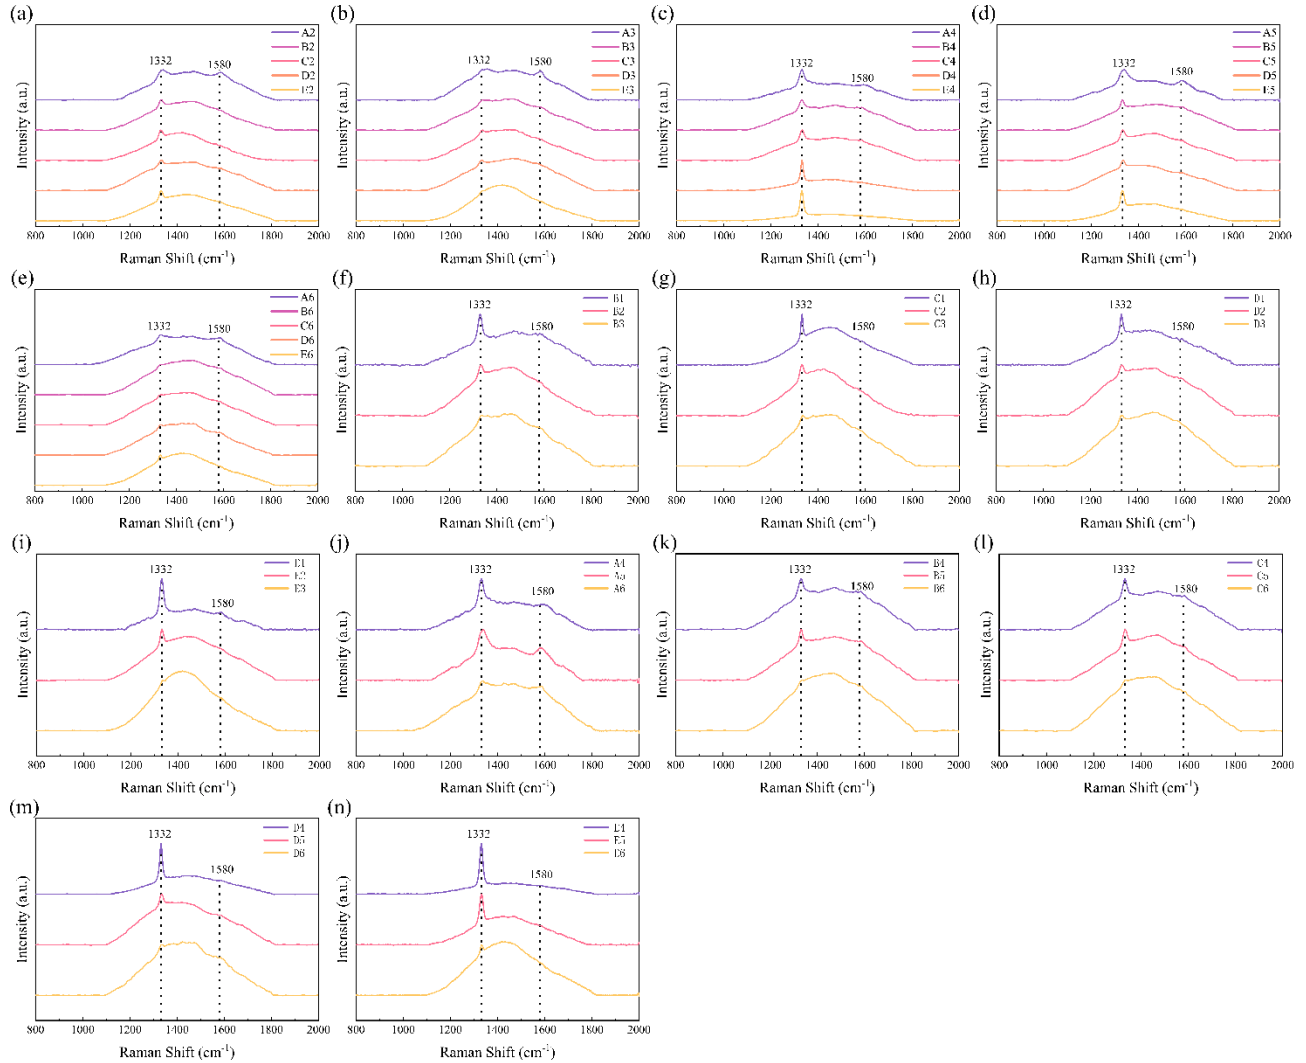

**Figure S3.** Raman spectra of each hot-pressed diamond samples

Fitted Raman image were shown in Figure S4. Figure S4 (a), (b), (c), (d) and (e) represent hot-pressed samples of components A, B, C, D, E from 30 MPa to 4 kW, respectively. Figure S6 (f), (g), (h), (i) and (j) represent hot-pressed samples of components A, B, C, D, E from 30 MPa to 5 kW, respectively. Figure S4 (k), (l), (m), (n) and (o) represent hot-pressed samples of components A, B, C, D, E from 30 MPa to 6 kW, respectively. Figure S6 (p), (q), (r) and (s) represent hot-pressed samples of components A, B, D, E from 40 MPa to 5 kW, respectively. Figure S4 (t), (u), (v) and (w) represent hot-pressed samples of components A, B, D, E from 40 MPa to 6 kW,

respectively.

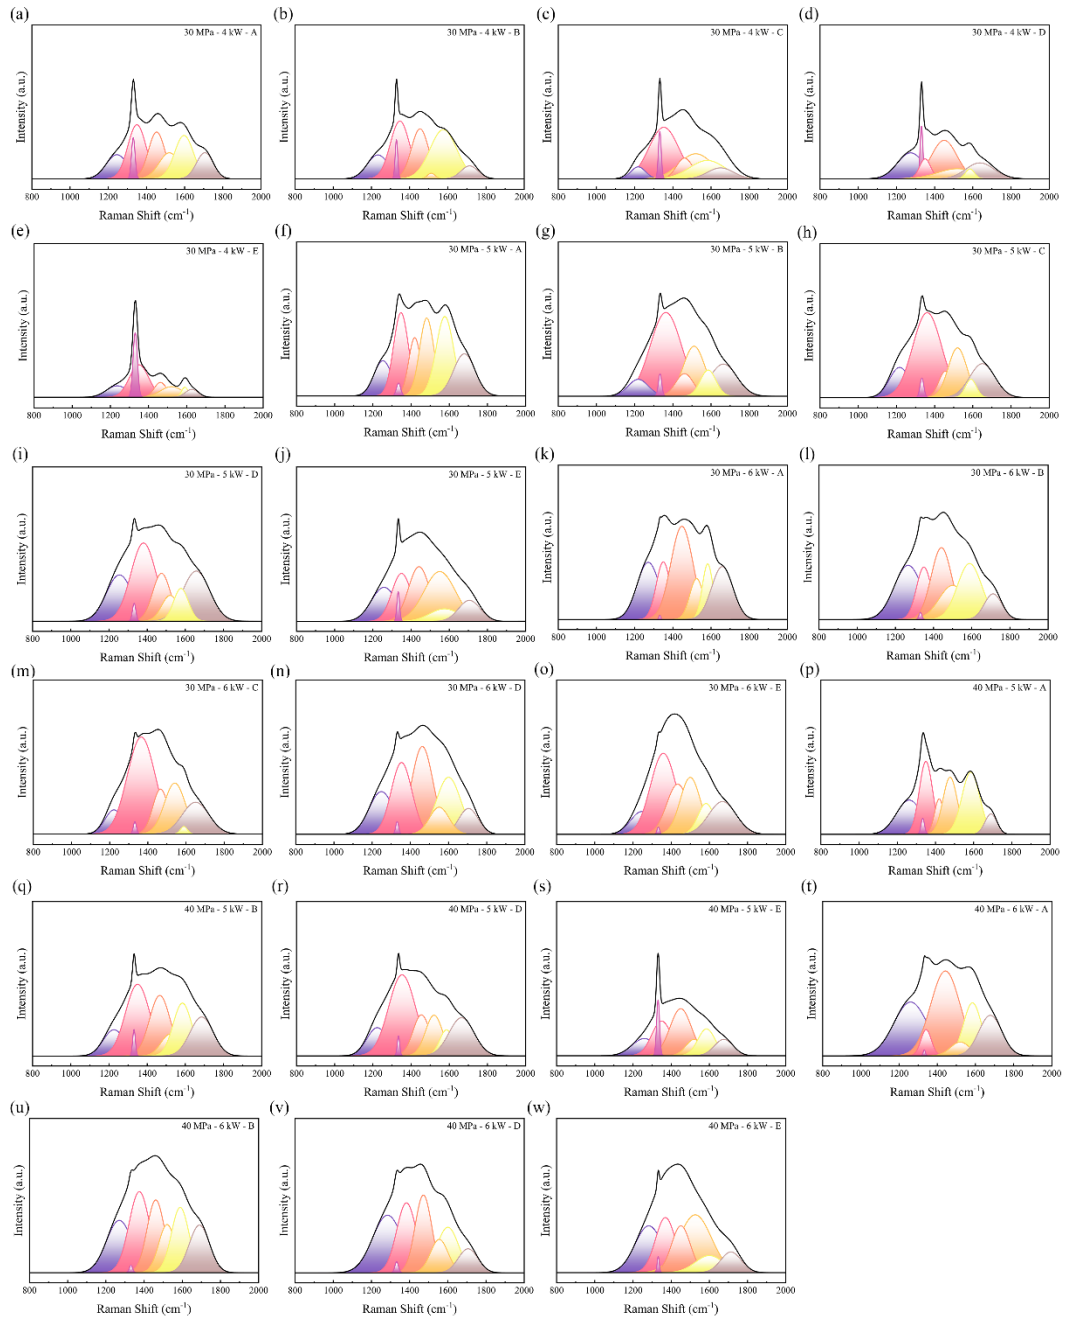

**Figure S4.** Fitted Raman of each hot-pressed diamond samples
